# Supplementary material for: Why Monoamine Oxidase B Preferably Metabolizes N-Methylhistamine over Histamine: Evidence from the Multiscale Simulation of the Rate-Limiting Step
Source: MDPI journal article supplement (doi:10.3390/ijms23031910), 2022-02-08
Supplement: s1 [file s1]

## Supplementary Materials

### **Why Monoamine Oxidase B Preferably Metabolizes *N*-methylhistamine over Histamine: Evidence from the Multiscale Simulation of the Rate Limiting Step**

Aleksandra Maršavelski,<sup>a, b, d</sup> Janez Mavri,<sup>d</sup> Robert Vianello<sup>a, c, \*</sup> and Jernej Stare<sup>d, \*</sup>

<sup>a</sup> Computational Organic Chemistry and Biochemistry Group, Ruđer Bošković Institute, Bijenička 54, HR-10000 Zagreb, Croatia (affiliation at the time of research)

<sup>b</sup> Department of Chemistry, Faculty of Science, University of Zagreb, Horvatovac 102a, HR-10000 Zagreb, Croatia (present affiliation)

<sup>c</sup> Laboratory for the Computational Design and Synthesis of Functional Materials, Ruđer Bošković Institute, Bijenička 54, HR-10000 Zagreb, Croatia (present affiliation)

<sup>d</sup> Theory Department, National Institute of Chemistry, Hajdrihova 19, SI-1000 Ljubljana, Slovenia

\* Corresponding authors, e-mail: [robert.vianello@irb.hr](mailto:robert.vianello@irb.hr) (R.V.), [jernej.stare@ki.si](mailto:jernej.stare@ki.si) (J.S.)

## Table of Contents

|                                                                                                                                                                                    |           |
|------------------------------------------------------------------------------------------------------------------------------------------------------------------------------------|-----------|
| <i>Figure S1. Valence bond states and atom numbering used in this work to describe the hydride transfer from histamine to FAD of MAO B.....</i>                                    | <i>3</i>  |
| <i>Figure S2. Valence bond states and atom numbering used in this work to describe the hydride transfer from N-methylhistamine to FAD of MAO B. ....</i>                           | <i>4</i>  |
| <i>Table S1. List of ionized residues, as well as the protonation states of histidines, in the EVB simulations.....</i>                                                            | <i>5</i>  |
| <i>Table S2. Nonbonding parameters used to describe the two EVB states during the direct hydride transfer in the oxidative deamination of histamine by MAO-B .....</i>             | <i>6</i>  |
| <i>Table S3. Bonding parameters used to describe the two EVB states during the direct hydride transfer step of the oxidative deamination of histamine by MAO-B.....</i>            | <i>7</i>  |
| <i>Table S4. Angle parameters used to describe the two EVB states for the hydride transfer step of the oxidative deamination of histamine by MAO-B.....</i>                        | <i>8</i>  |
| <i>Table S5. Torsion parameters used to describe the two EVB states for the hydride transfer step of the oxidative deamination of histamine by MAO-B.....</i>                      | <i>9</i>  |
| <i>Table S6. Improper torsion types used to describe the two EVB states for the hydride transfer step of the oxidative deamination of histamine by MAO-B .....</i>                 | <i>10</i> |
| <i>Table S7. Nonbonding parameters used to describe the two EVB states during the direct hydride transfer in the oxidative deamination of N-methylhistamine by MAO-B. ....</i>     | <i>11</i> |
| <i>Table S8. Bonding parameters used to describe the two EVB states during the direct hydride transfer step of the oxidative deamination of N-methylhistamine by MAO-B .....</i>   | <i>12</i> |
| <i>Table S9. Angle parameters used to describe the two EVB states for the direct hydride transfer step of the oxidative deamination of N-methylhistamine by MAO-B.....</i>         | <i>13</i> |
| <i>Table S10. Torsion parameters used to describe the two EVB states for the direct hydride transfer step of the oxidative deamination of N-methylhistamine by MAO-B.....</i>      | <i>14</i> |
| <i>Table S11. Improper torsion types used to describe the two EVB states for the direct hydride transfer step of the oxidative deamination of N-methylhistamine by MAO-B. ....</i> | <i>15</i> |
| <i>Transition state histamine (TS) .....</i>                                                                                                                                       | <i>16</i> |
| <i>Transition state N-methylhistamine (TS).....</i>                                                                                                                                | <i>17</i> |

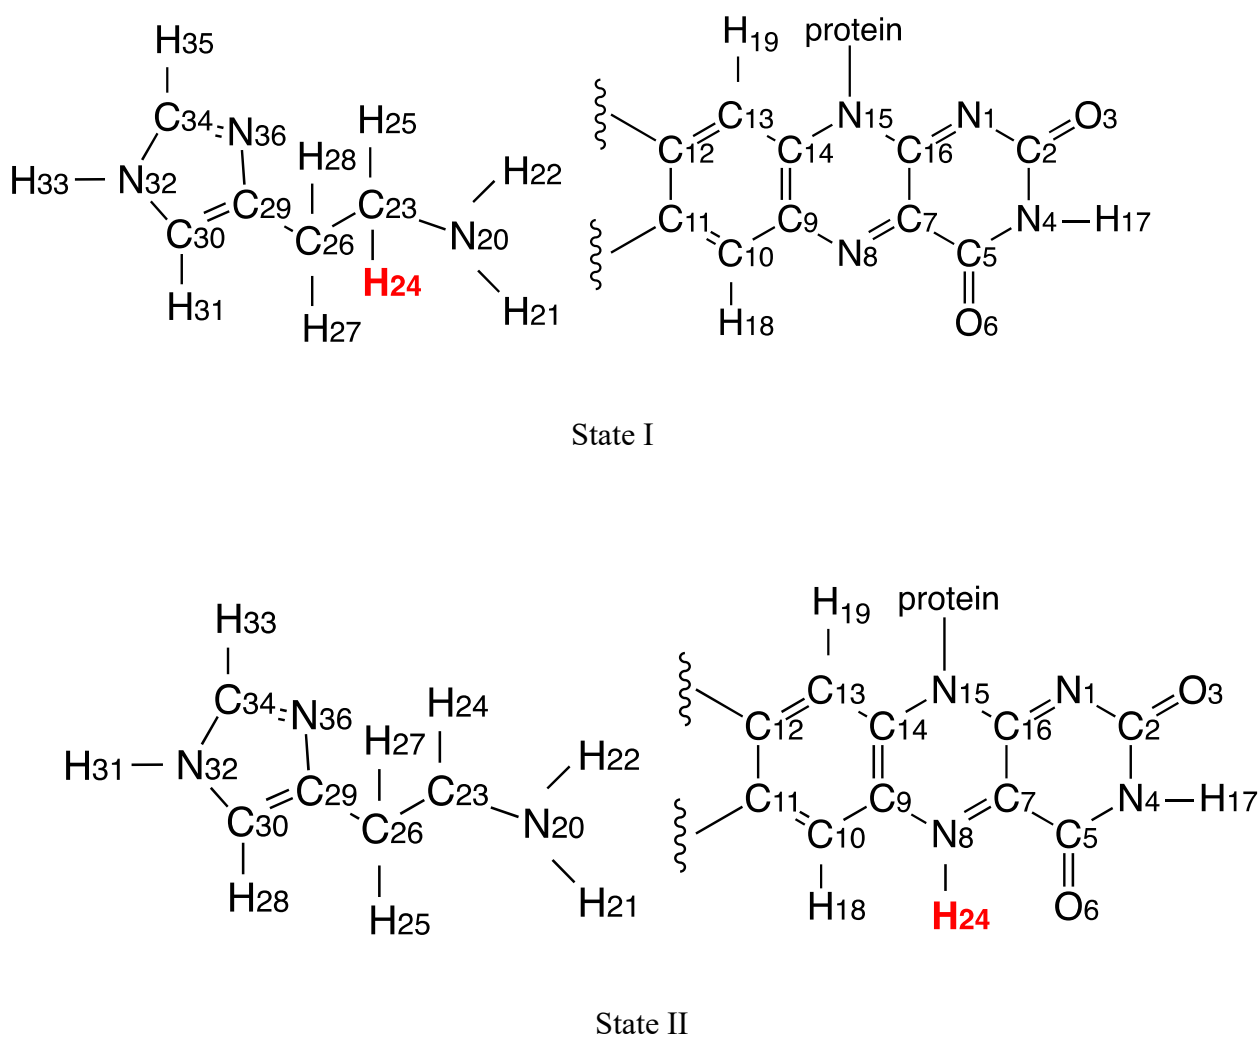

**Figure S1.** Valence bond states and atom numbering used in this work to describe the hydride transfer from histamine to FAD of MAO B. States I and II correspond to the reactant and intermediate states of the catalytic cycle, respectively. The hydride being transferred is labeled in red.

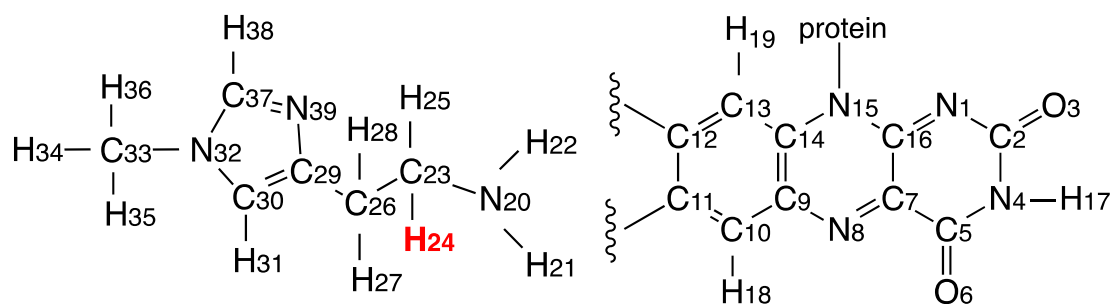

State I

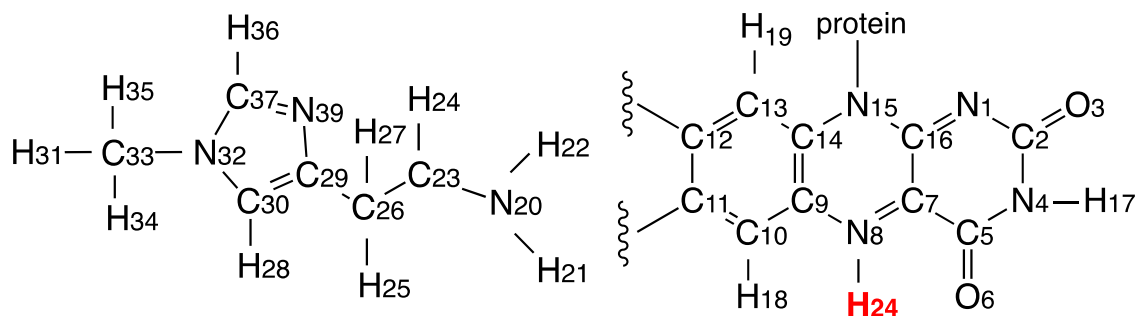

State II

**Figure S2.** Valence bond states and atom numbering used in this work to describe the hydride transfer from N-methylhistamine to FAD of MAO B. States I and II correspond to the reactant and intermediate states of the catalytic cycle, respectively. The hydride being transferred is labeled in red.

**Table S1.** List of ionized residues, as well as the protonation states of histidines, in the EVB simulations. The remaining residues were kept in their neutral forms, as they were located outside the 30 Å explicit simulation sphere centered at the reactive nitrogen atom of the flavin cofactor, as described in the main text (see also ref. 38 cited therein).

| Residue         | Residue number                                                                                                     |
|-----------------|--------------------------------------------------------------------------------------------------------------------|
| Asp             | 37, 55, 123, 132, 144, 223, 318, 329, 330, 471                                                                     |
| Glu             | 34, 74, 78, 84, 86, 176, 179, 207, 219, 232, 320, 321, 334, 358, 384, 385, 390, 391, 427, 437, 441, 444, 466, 468, |
| Lys             | 21, 50, 52, 73, 81, 190, 209, 271, 296, 332, 351, 348, 357, 363, 386                                               |
| Arg             | 36, 38, 42, 47, 67, 70, 197, 208, 220, 282, 307, 350, 354, 360, 415, 445, 448                                      |
| His- $\delta$   | /                                                                                                                  |
| His- $\epsilon$ | 24, 90, 91, 115, 178, 252, 273, 347, 382, 431, 452, 485                                                            |

**Table S2.** Nonbonding parameters used to describe the two EVB states during the direct hydride transfer in the oxidative deamination of histamine by MAO-B.<sup>a</sup>

| Atom number | State I   |         |         | State II  |         |         |
|-------------|-----------|---------|---------|-----------|---------|---------|
|             | $A_i$     | $B_i$   | $q_i$   | $A_i$     | $B_i$   | $q_i$   |
| 1           | 885.43    | 27.02   | -0.7443 | 971.75    | 28.31   | -0.8619 |
| 2           | 1802.24   | 34.18   | 1.0090  | 1802.24   | 34.18   | 0.9920  |
| 3           | 616.44    | 23.77   | -0.6117 | 616.44    | 23.77   | -0.7546 |
| 4           | 971.75    | 28.31   | -0.7738 | 971.75    | 28.31   | -0.7680 |
| 5           | 1802.24   | 34.18   | 0.7294  | 1039.88   | 24.25   | 0.7563  |
| 6           | 616.44    | 23.77   | -0.5553 | 976.93    | 31.26   | -0.7333 |
| 7           | 1059.13   | 23.67   | 0.2576  | 1039.88   | 24.25   | -0.4382 |
| 8           | 971.75    | 28.31   | -0.5511 | 1064.97   | 29.63   | -0.4260 |
| 9           | 1059.13   | 23.67   | 0.4846  | 1059.13   | 23.67   | 0.2654  |
| 10          | 1059.13   | 23.67   | -0.3610 | 1059.13   | 23.67   | -0.5285 |
| 11          | 1059.13   | 23.67   | 0.1155  | 1059.13   | 23.67   | 0.2023  |
| 12          | 1059.13   | 23.67   | 0.1463  | 1059.13   | 23.67   | 0.0387  |
| 13          | 1059.13   | 23.67   | -0.2837 | 1059.13   | 23.67   | -0.3640 |
| 14          | 1059.13   | 23.67   | -0.1662 | 1059.13   | 23.67   | 0.0233  |
| 15          | 1064.97   | 29.63   | 0.0996  | 971.75    | 28.31   | -0.0233 |
| 16          | 58.02     | 5.09    | 0.3831  | 1039.88   | 24.25   | 0.5280  |
| 17          | 0.00      | 0.00    | 0.4042  | 0.00      | 0.00    | 0.3553  |
| 18          | 69.58     | 4.91    | 0.2236  | 69.58     | 4.91    | 0.2061  |
| 19          | 69.58     | 4.91    | 0.1942  | 69.58     | 4.91    | 0.1982  |
| 20          | 1064.9718 | 29.6344 | -1.1151 | 971.7502  | 28.3077 | -0.6128 |
| 21          | 0.0054    | 0.0433  | 0.3880  | 0.0054    | 0.0433  | 0.4160  |
| 22          | 0.0054    | 0.0433  | 0.3880  | 0.0054    | 0.0433  | 0.4160  |
| 23          | 944.5180  | 22.0296 | 0.7774  | 1802.2385 | 34.1758 | 0.4763  |
| 24          | 59.8020   | 3.8273  | -0.1011 | 0.00      | 0.00    | 0.3322  |
| 25          | 59.8020   | 3.8273  | -0.1011 | 69.5797   | 4.9095  | 0.1311  |
| 26          | 944.5180  | 22.0296 | -0.6418 | 944.5180  | 22.0296 | -0.4045 |
| 27          | 84.5728   | 5.4127  | 0.1318  | 84.5728   | 5.4127  | 0.1708  |
| 28          | 84.5728   | 5.4127  | 0.1318  | 84.5728   | 5.4127  | 0.1708  |
| 29          | 1059.1297 | 23.6736 | 0.5435  | 1059.1297 | 23.6736 | 0.4185  |
| 30          | 1059.1297 | 23.6736 | -0.3786 | 1059.1297 | 23.6736 | -0.3488 |
| 31          | 69.5797   | 4.9095  | 0.2198  | 69.5797   | 4.9095  | 0.2564  |
| 32          | 971.7502  | 28.3077 | -0.3306 | 971.7502  | 28.3077 | -0.2222 |
| 33          | 0.0054    | 0.0433  | 0.3499  | 0.0054    | 0.0433  | 0.3610  |
| 34          | 1059.1297 | 23.6736 | 0.2303  | 1059.1297 | 23.6736 | 0.1491  |
| 35          | 69.5797   | 4.9095  | 0.1145  | 69.5797   | 4.9095  | 0.1769  |
| 36          | 971.7502  | 28.3077 | -0.6068 | 971.7502  | 28.3077 | -0.5545 |

<sup>a</sup> The atom numbering corresponding to valence bond states shown in Figure S1, with States I and II corresponding to the reactant and product states respectively. Van der Waals interactions were described by the 12-6 Lennard Jones potential, where  $A_i$  and  $B_i$  are single-atom (square-rooted) parameters in units of  $\text{kcal}^{1/2} \cdot \text{mol}^{-1/2} \cdot \text{\AA}^{-6}$  and  $\text{kcal}^{1/2} \cdot \text{mol}^{-1/2} \cdot \text{\AA}^{-3}$ , respectively, while  $q_i$  is the partial atomic charge.

**Table S3.** Bonding parameters used to describe the two EVB states during the direct hydride transfer step of the oxidative deamination of histamine by MAO-B.<sup>a</sup>

| Atom number |    | State I |        | State II |        |
|-------------|----|---------|--------|----------|--------|
| #1          | #2 | $f_c$   | $r_0$  | $f_c$    | $r_0$  |
| 1           | 2  | 1000.00 | 1.261  | 914.00   | 1.358  |
| 1           | 16 | 1000.00 | 1.261  | 966.00   | 1.339  |
| 2           | 4  | 980.00  | 1.335  | 836.00   | 1.388  |
| 4           | 5  | 980.00  | 1.335  | 896.00   | 1.365  |
| 5           | 6  | 1140.00 | 1.229  | 900.00   | 1.370  |
| 5           | 7  | 938.00  | 1.400  | 1098.00  | 1.340  |
| 7           | 8  | 914.00  | 1.358  | 962.00   | 1.340  |
| 7           | 16 | 800.00  | 1.490  | 854.00   | 1.433  |
| 8           | 9  | 966.00  | 1.339  | 962.00   | 1.340  |
| 20          | 21 | 868.00  | 1.0100 | 980.00   | 1.0150 |
| 20          | 22 | 868.00  | 1.0100 | 980.00   | 1.0150 |
| 20          | 23 | 764.00  | 1.4480 | 1270.00  | 1.2860 |
| 23          | 25 | 680.00  | 1.0900 | 770.00   | 1.0830 |
| 23          | 26 | 536.00  | 1.5290 | 580.00   | 1.4880 |

|    |    | $D_e$       | $a$         | $r_0$       | $D_e$       | $a$         | $r_0$       |
|----|----|-------------|-------------|-------------|-------------|-------------|-------------|
| 8  | 24 | <i>n.a.</i> | <i>n.a.</i> | <i>n.a.</i> | 100.60      | 2.000       | 1.100       |
| 23 | 24 | 102.76      | 2.000       | 1.100       | <i>n.a.</i> | <i>n.a.</i> | <i>n.a.</i> |

<sup>a</sup> The atom numbering corresponds to the atoms displayed in Figure S1, with States I and II corresponding to the reactant and intermediate states, respectively. Bonds were described with either a harmonic potential of the form  $E_{\text{bond}} = \frac{1}{2} \cdot f_c (r - r_0)^2$ , or in the case of forming or breaking bonds, with a Morse potential of the form  $E_{\text{bond}} = D_e \cdot (e^{-2a \cdot (r - r_0)} - 2e^{-a \cdot (r - r_0)})$ . All  $f_c$  and  $D_e$  values are given in kcal·mol<sup>-1</sup>, and  $r_0$  values in Å.

**Table S4.** Angle parameters used to describe the two EVB states for the hydride transfer step of the oxidative deamination of histamine by MAO-B.<sup>a</sup>

| Atom number |    |    | State I     |             | State II    |             |
|-------------|----|----|-------------|-------------|-------------|-------------|
| #1          | #2 | #3 | $f_c$       | $\theta$    | $f_c$       | $\theta$    |
| 1           | 2  | 3  | 160.00      | 120.600     | 160.00      | 122.500     |
| 1           | 2  | 4  | 140.00      | 114.200     | 140.00      | 118.600     |
| 1           | 16 | 15 | 140.00      | 124.100     | 140.00      | 119.300     |
| 2           | 1  | 16 | 100.00      | 120.500     | 140.00      | 120.500     |
| 2           | 4  | 5  | 140.00      | 126.400     | 140.00      | 121.600     |
| 2           | 4  | 17 | 70.00       | 119.800     | 70.00       | 116.800     |
| 3           | 2  | 4  | 160.00      | 122.900     | 160.00      | 120.600     |
| 4           | 5  | 6  | 160.00      | 122.900     | 160.00      | 120.600     |
| 4           | 5  | 7  | 140.00      | 116.600     | 140.00      | 121.200     |
| 5           | 4  | 17 | 70.00       | 119.800     | 70.00       | 119.200     |
| 5           | 7  | 8  | 160.00      | 123.000     | 140.00      | 121.200     |
| 5           | 7  | 16 | 160.00      | 117.200     | 170.00      | 170.00      |
| 6           | 5  | 7  | 160.00      | 121.400     | 140.00      | 123.00      |
| 7           | 8  | 9  | 140.00      | 120.500     | 100.00      | 109.500     |
| 7           | 8  | 24 | <i>n.a.</i> | <i>n.a.</i> | 70.00       | 111.00      |
| 8           | 7  | 16 | 160.00      | 123.00      | 140.00      | 120.100     |
| 8           | 9  | 10 | 140.00      | 124.00      | 140.00      | 120.100     |
| 8           | 9  | 14 | 140.00      | 124.00      | 140.00      | 120.100     |
| 9           | 8  | 24 | <i>n.a.</i> | <i>n.a.</i> | 70.00       | 111.00      |
| 20          | 23 | 24 | 70.00       | 109.500     | <i>n.a.</i> | <i>n.a.</i> |
| 20          | 23 | 25 | 70.00       | 109.500     | 90.00       | 118.0390    |
| 20          | 23 | 26 | 112.40      | 109.4700    | 140.00      | 120.6520    |
| 21          | 20 | 22 | 87.20       | 106.4000    | 60.00       | 117.8320    |
| 21          | 20 | 23 | 70.00       | 109.5000    | 90.00       | 118.8950    |
| 22          | 20 | 23 | 70.00       | 109.5000    | 90.00       | 118.8950    |
| 23          | 26 | 27 | 75.00       | 110.7000    | 90.00       | 109.3340    |
| 23          | 26 | 28 | 75.00       | 110.7000    | 90.00       | 109.3340    |
| 23          | 26 | 29 | 140.00      | 112.6240    | 140.00      | 112.3600    |
| 24          | 23 | 25 | 66.00       | 107.800     | <i>n.a.</i> | <i>n.a.</i> |
| 24          | 23 | 26 | 75.00       | 110.700     | <i>n.a.</i> | <i>n.a.</i> |
| 25          | 23 | 26 | 75.00       | 110.700     | 70.00       | 121.9150    |

<sup>a</sup> The atom numbering corresponding to the atom numbering used here are displayed in Figure S1, with States I and II corresponding to reactant and product states, respectively. The bending motion was described with a harmonic potential of the form  $E_{\text{angle}} = f_c \cdot (\theta - \theta_0)^2$ , where  $f_c$  is given in kcal·mol<sup>-1</sup> and  $\theta$  in °.

**Table S5.** Torsion parameters used to describe the two EVB states for the hydride transfer step of the oxidative deamination of histamine by MAO-B.<sup>a</sup>

| Atom number |    |    |    | State I     |             |             | State II    |             |             |
|-------------|----|----|----|-------------|-------------|-------------|-------------|-------------|-------------|
| #1          | #2 | #3 | #4 | $V_1$       | $V_2$       | $V_3$       | $V_1$       | $V_2$       | $V_3$       |
| 1           | 2  | 4  | 5  | 0.000       | 3.968       | 0.000       | 0.000       | 2.325       | 0.000       |
| 1           | 2  | 4  | 17 | 0.000       | 1.015       | 0.000       | 0.000       | 2.325       | 0.000       |
| 5           | 7  | 16 | 1  | 0.000       | 0.839       | 0.000       | 0.000       | 7.000       | 0.000       |
| 8           | 7  | 16 | 1  | 0.000       | 3.500       | 0.000       | 0.000       | 7.000       | 0.000       |
| 14          | 15 | 16 | 1  | 0.000       | 1.826       | 0.000       | 0.000       | 3.968       | 0.000       |
| 2           | 1  | 16 | 7  | -1.183      | 0.456       | -0.425      | 0.000       | 3.625       | 0.000       |
| 2           | 1  | 16 | 15 | 0.000       | 1.826       | 0.000       | 0.000       | 3.625       | 0.000       |
| 2           | 4  | 5  | 6  | 0.000       | 3.045       | 0.000       | 0.000       | 3.625       | 0.000       |
| 2           | 4  | 5  | 7  | 1.150       | 3.045       | 0.000       | 0.000       | 3.625       | 0.000       |
| 16          | 1  | 2  | 4  | 0.000       | 1.826       | 0.000       | 0.000       | 5.000       | 0.000       |
| 4           | 5  | 7  | 8  | 0.000       | 3.500       | 0.000       | 0.000       | 7.000       | 0.000       |
| 4           | 5  | 7  | 16 | 0.000       | 0.550       | 0.000       | 0.000       | 7.000       | 0.000       |
| 5           | 7  | 8  | 9  | 0.000       | 7.000       | 0.000       | -3.791      | 1.715       | 1.599       |
| 5           | 7  | 8  | 24 | <i>n.a.</i> | <i>n.a.</i> | <i>n.a.</i> | 0.000       | 1.015       | 0.000       |
| 5           | 7  | 16 | 15 | 0.000       | 0.839       | 0.000       | 0.000       | 7.000       | 0.000       |
| 17          | 4  | 5  | 6  | 0.000       | 2.450       | 0.000       | 0.000       | 3.625       | 0.000       |
| 6           | 5  | 7  | 8  | 0.000       | 0.410       | 0.000       | 0.000       | 7.000       | 0.000       |
| 6           | 5  | 7  | 16 | 0.000       | 1.050       | 0.000       | 0.000       | 7.000       | 0.000       |
| 17          | 4  | 5  | 7  | 0.000       | 2.450       | 0.000       | 0.000       | 1.525       | 0.000       |
| 7           | 8  | 9  | 10 | 0.000       | 3.625       | 0.000       | -3.791      | 1.715       | 1.599       |
| 7           | 8  | 9  | 14 | 0.000       | 3.625       | 0.000       | -3.791      | 1.715       | 1.599       |
| 8           | 7  | 16 | 15 | 0.0000      | 3.500       | 0.000       | 0.000       | 7.000       | 0.000       |
| 16          | 7  | 8  | 9  | 0.000       | 7.000       | 0.000       | -3.791      | 1.715       | 1.599       |
| 24          | 8  | 9  | 10 | <i>n.a.</i> | <i>n.a.</i> | <i>n.a.</i> | 0.000       | 1.015       | 0.000       |
| 24          | 8  | 9  | 14 | <i>n.a.</i> | <i>n.a.</i> | <i>n.a.</i> | 0.000       | 1.015       | 0.000       |
| 16          | 7  | 8  | 24 | <i>n.a.</i> | <i>n.a.</i> | <i>n.a.</i> | 0.000       | 1.015       | 0.000       |
| 20          | 23 | 26 | 27 | 0.1500      | 0           | 0           | 0           | 0           | 0           |
| 20          | 23 | 26 | 28 | 0.1500      | 0           | 0           | 0           | 0           | 0           |
| 20          | 23 | 26 | 29 | 0.8375      | 0.3220      | 0.7060      | 0           | 0           | 0           |
| 21          | 20 | 23 | 24 | 0.2000      | 0           | 0           | <i>n.a.</i> | <i>n.a.</i> | <i>n.a.</i> |
| 21          | 20 | 23 | 25 | 0.2000      | 0           | 0           | 2.000       | 0           | 0           |
| 21          | 20 | 23 | 26 | -0.0595     | 0.0885      | 0.1175      | 2.000       | 0           | 0           |
| 22          | 20 | 23 | 24 | 0.2000      | 0           | 0           | <i>n.a.</i> | <i>n.a.</i> | <i>n.a.</i> |
| 22          | 20 | 23 | 25 | 0.2000      | 0           | 0           | 2.000       | 0           | 0           |
| 22          | 20 | 23 | 26 | -0.0595     | 0.0885      | 0.1175      | 2.000       | 0           | 0           |
| 23          | 26 | 29 | 30 | 0.0415      | 0           | 0           | 0.1805      | 0           | 0           |
| 23          | 26 | 29 | 36 | 0.2930      | -1.1970     | 0.6090      | 0.0430      | 0           | 0           |
| 24          | 23 | 26 | 27 | 0.1500      | 0           | 0           | <i>n.a.</i> | <i>n.a.</i> | <i>n.a.</i> |
| 24          | 23 | 26 | 28 | 0.1500      | 0           | 0           | <i>n.a.</i> | <i>n.a.</i> | <i>n.a.</i> |
| 24          | 23 | 26 | 29 | 0.4320      | 0           | 0           | <i>n.a.</i> | <i>n.a.</i> | <i>n.a.</i> |
| 25          | 23 | 26 | 27 | 0.1500      | 0           | 0           | 0.3310      | 0           | 0           |
| 25          | 23 | 26 | 28 | 0.1500      | 0           | 0           | 0.3310      | 0           | 0           |
| 25          | 23 | 26 | 29 | 0.4320      | 0           | 0           | 0           | 0           | 0           |

<sup>a</sup>The atom numbering corresponds to the atom numbers used in Figure S1, with States I and II corresponding to the reactant and product states respectively. All parameters have units of kcal·mol<sup>-1</sup>. Dihedral interactions (including improper dihedrals) were described by a periodic function of the form  $E_{\text{torsion}} = V_1 \cdot (1 + \cos \varphi) + V_2 \cdot (1 - \cos 2\varphi) + V_3 \cdot (1 + \cos 3\varphi)$ .

**Table S6.** Improper torsion types used to describe the two EVB states for the hydride transfer step of the oxidative deamination of histamine by MAO-B.<sup>a</sup>

| Atom number |    |    |    | State I     |             | State II |          |
|-------------|----|----|----|-------------|-------------|----------|----------|
| #1          | #2 | #3 | #4 | $k_a$       | $\tau_0$    | $k_a$    | $\tau_0$ |
| 7           | 5  | 4  | 6  | 10.5        | 180         | 1.1      | 180      |
| 16          | 7  | 5  | 8  | 10.5        | 180         | 1.1      | 180      |
| 23          | 20 | 21 | 22 | <i>n.a.</i> | <i>n.a.</i> | 1        | 180      |
| 7           | 8  | 9  | 24 | <i>n.a.</i> | <i>n.a.</i> | 1        | 180      |
| 26          | 23 | 25 | 20 | <i>n.a.</i> | <i>n.a.</i> | 10.5     | 180      |

<sup>a</sup> The units of  $k_a$  and  $\tau_0$  are given in kcal·mol<sup>-1</sup>·rad<sup>-2</sup> and °, respectively

**Table S7.** Nonbonding parameters used to describe the two EVB states during the direct hydride transfer in the oxidative deamination of N-methylhistamine by MAO-B.<sup>a</sup>

| Atom number | State I   |         |         | State II  |         |         |
|-------------|-----------|---------|---------|-----------|---------|---------|
|             | $A_i$     | $B_i$   | $q_i$   | $A_i$     | $B_i$   | $q_i$   |
| 1           | 885.43    | 27.02   | -0.7443 | 971.75    | 28.31   | -0.8619 |
| 2           | 1802.24   | 34.18   | 1.0090  | 1802.24   | 34.18   | 0.9920  |
| 3           | 616.44    | 23.77   | -0.6117 | 616.44    | 23.77   | -0.7546 |
| 4           | 971.75    | 28.31   | -0.7738 | 971.75    | 28.31   | -0.7680 |
| 5           | 1802.24   | 34.18   | 0.7294  | 1039.88   | 24.25   | 0.7563  |
| 6           | 616.44    | 23.77   | -0.5553 | 976.93    | 31.26   | -0.7333 |
| 7           | 1059.13   | 23.67   | 0.2576  | 1039.88   | 24.25   | -0.4382 |
| 8           | 971.75    | 28.31   | -0.5511 | 1064.97   | 29.63   | -0.4260 |
| 9           | 1059.13   | 23.67   | 0.4846  | 1059.13   | 23.67   | 0.2654  |
| 10          | 1059.13   | 23.67   | -0.3610 | 1059.13   | 23.67   | -0.5285 |
| 11          | 1059.13   | 23.67   | 0.1155  | 1059.13   | 23.67   | 0.2023  |
| 12          | 1059.13   | 23.67   | 0.1463  | 1059.13   | 23.67   | 0.0387  |
| 13          | 1059.13   | 23.67   | -0.2837 | 1059.13   | 23.67   | -0.3640 |
| 14          | 1059.13   | 23.67   | -0.1662 | 1059.13   | 23.67   | 0.0233  |
| 15          | 1064.97   | 29.63   | 0.0996  | 971.75    | 28.31   | -0.0233 |
| 16          | 58.02     | 5.09    | 0.3831  | 1039.88   | 24.25   | 0.5280  |
| 17          | 0.00      | 0.00    | 0.4042  | 0.00      | 0.00    | 0.3553  |
| 18          | 69.58     | 4.91    | 0.2236  | 69.58     | 4.91    | 0.2061  |
| 19          | 69.58     | 4.91    | 0.1942  | 69.58     | 4.91    | 0.1982  |
| 20          | 1064.9718 | 29.6344 | -1.1061 | 971.7502  | 28.3077 | -0.5972 |
| 21          | 0.0054    | 0.0433  | 0.3896  | 0.0054    | 0.0433  | 0.4144  |
| 22          | 0.0054    | 0.0433  | 0.3896  | 0.0054    | 0.0433  | 0.4144  |
| 23          | 944.5180  | 22.0296 | 0.6832  | 1802.2385 | 34.1758 | 0.4365  |
| 24          | 59.8020   | 3.8273  | -0.0796 | 0.00      | 0.00    | 0.3322  |
| 25          | 59.8020   | 3.8273  | -0.0796 | 69.5797   | 4.9095  | 0.1311  |
| 26          | 944.5180  | 22.0296 | -0.5259 | 944.5180  | 22.0296 | -0.3185 |
| 27          | 84.5728   | 5.4127  | 0.1066  | 84.5728   | 5.4127  | 0.1543  |
| 28          | 84.5728   | 5.4127  | 0.1066  | 84.5728   | 5.4127  | 0.1543  |
| 29          | 1059.1297 | 23.6736 | 0.5480  | 1059.1297 | 23.6736 | 0.4010  |
| 30          | 1059.1297 | 23.6736 | -0.5412 | 1059.1297 | 23.6736 | -0.4700 |
| 31          | 69.5797   | 4.9095  | 0.2418  | 69.5797   | 4.9095  | 0.2713  |
| 32          | 971.7502  | 28.3077 | 0.1521  | 971.7502  | 28.3077 | 0.1924  |
| 33          | 944.5180  | 22.0296 | -0.3352 | 944.5180  | 22.0296 | -0.3248 |
| 34          | 84.5728   | 5.4127  | 0.1337  | 84.5728   | 5.4127  | 0.1507  |
| 35          | 84.5728   | 5.4127  | 0.1337  | 84.5728   | 5.4127  | 0.1507  |
| 36          | 84.5728   | 5.4127  | 0.1337  | 84.5728   | 5.4127  | 0.1507  |
| 37          | 1059.1297 | 23.6736 | 0.1384  | 1059.1297 | 23.6736 | 0.0907  |
| 38          | 69.5797   | 4.9095  | 0.1363  | 69.5797   | 4.9095  | 0.1848  |
| 39          | 971.7502  | 28.3077 | -0.6321 | 971.7502  | 28.3077 | -0.5889 |

<sup>a</sup> The atom numbering corresponding to valence bond states shown in Figure S2, with States I and II corresponding to the reactant and product states respectively. Van der Waals interactions were described by the 12-6 Lennard Jones potential, where  $A_i$  and  $B_i$  are single-atom (square-rooted) parameters in units of  $\text{kcal}^{1/2} \cdot \text{mol}^{-1/2} \cdot \text{\AA}^{-6}$  and  $\text{kcal}^{1/2} \cdot \text{mol}^{-1/2} \cdot \text{\AA}^{-3}$ , respectively, while  $q_i$  is the partial atomic charge.

**Table S8.** Bonding parameters used to describe the two EVB states during the direct hydride transfer step of the oxidative deamination of N-methylhistamine by MAO-B.<sup>a</sup>

| Atom number |    | State I |        | State II |        |
|-------------|----|---------|--------|----------|--------|
| #1          | #2 | $f_c$   | $r_0$  | $f_c$    | $r_0$  |
| 1           | 2  | 1000.00 | 1.261  | 914.00   | 1.358  |
| 1           | 16 | 1000.00 | 1.261  | 966.00   | 1.339  |
| 2           | 4  | 980.00  | 1.335  | 836.00   | 1.388  |
| 4           | 5  | 980.00  | 1.335  | 896.00   | 1.365  |
| 5           | 6  | 1140.00 | 1.229  | 900.00   | 1.370  |
| 5           | 7  | 938.00  | 1.400  | 1098.00  | 1.340  |
| 7           | 8  | 914.00  | 1.358  | 962.00   | 1.340  |
| 7           | 16 | 800.00  | 1.490  | 854.00   | 1.433  |
| 8           | 9  | 966.00  | 1.339  | 962.00   | 1.340  |
| 20          | 21 | 868.00  | 1.0100 | 980.00   | 1.0150 |
| 20          | 22 | 868.00  | 1.0100 | 980.00   | 1.0150 |
| 20          | 23 | 764.00  | 1.4480 | 1270.00  | 1.2860 |
| 23          | 25 | 680.00  | 1.0900 | 770.00   | 1.0830 |
| 23          | 26 | 536.00  | 1.5290 | 580.00   | 1.4880 |

|    |    | $D_e$       | $a$         | $r_0$       | $D_e$       | $a$         | $r_0$       |
|----|----|-------------|-------------|-------------|-------------|-------------|-------------|
| 8  | 24 | <i>n.a.</i> | <i>n.a.</i> | <i>n.a.</i> | 100.60      | 2.000       | 1.100       |
| 23 | 24 | 102.76      | 2.000       | 1.100       | <i>n.a.</i> | <i>n.a.</i> | <i>n.a.</i> |

<sup>a</sup>The atom numbering corresponds to the atoms displayed in Figure S2, with States I and II corresponding to the reactant and intermediate states, respectively. Bonds were described with either a harmonic potential of the form  $E_{\text{bond}} = \frac{1}{2} f_c (r - r_0)^2$ , or in the case of forming or breaking bonds, with a Morse potential of the form  $E_{\text{bond}} = D_e \cdot (e^{-2a \cdot (r - r_0)} - 2e^{-a \cdot (r - r_0)})$ . All  $f_c$  and  $D_e$  values are given in kcal·mol<sup>-1</sup>, and  $r_0$  values in Å.

**Table S9.** Angle parameters used to describe the two EVB states for the direct hydride transfer step of the oxidative deamination of N-methylhistamine by MAO-B.<sup>a</sup>

| Atom number |    |    | State I     |             | State II    |             |
|-------------|----|----|-------------|-------------|-------------|-------------|
| #1          | #2 | #3 | $f_c$       | $\theta$    | $f_c$       | $\theta$    |
| 1           | 2  | 3  | 160.00      | 120.600     | 160.00      | 122.500     |
| 1           | 2  | 4  | 140.00      | 114.200     | 140.00      | 118.600     |
| 1           | 16 | 15 | 140.00      | 124.100     | 140.00      | 119.300     |
| 2           | 1  | 16 | 100.00      | 120.500     | 140.00      | 120.500     |
| 2           | 4  | 5  | 140.00      | 126.400     | 140.00      | 121.600     |
| 2           | 4  | 17 | 70.00       | 119.800     | 70.00       | 116.800     |
| 3           | 2  | 4  | 160.00      | 122.900     | 160.00      | 120.600     |
| 4           | 5  | 6  | 160.00      | 122.900     | 160.00      | 120.600     |
| 4           | 5  | 7  | 140.00      | 116.600     | 140.00      | 121.200     |
| 5           | 4  | 17 | 70.00       | 119.800     | 70.00       | 119.200     |
| 5           | 7  | 8  | 160.00      | 123.000     | 140.00      | 121.200     |
| 5           | 7  | 16 | 160.00      | 117.200     | 170.00      | 117.000     |
| 6           | 5  | 7  | 160.00      | 121.400     | 140.00      | 123.00      |
| 7           | 8  | 9  | 140.00      | 120.500     | 100.00      | 109.500     |
| 7           | 8  | 24 | <i>n.a.</i> | <i>n.a.</i> | 70.00       | 111.00      |
| 8           | 7  | 16 | 160.00      | 123.00      | 140.00      | 120.100     |
| 8           | 9  | 10 | 140.00      | 124.00      | 140.00      | 120.100     |
| 8           | 9  | 14 | 140.00      | 124.00      | 140.00      | 120.100     |
| 9           | 8  | 24 | <i>n.a.</i> | <i>n.a.</i> | 70.00       | 111.00      |
| 20          | 23 | 24 | 70.00       | 109.500     | <i>n.a.</i> | <i>n.a.</i> |
| 20          | 23 | 25 | 70.00       | 109.500     | 90.00       | 118.0390    |
| 20          | 23 | 26 | 112.40      | 109.4700    | 140.00      | 120.6520    |
| 21          | 20 | 22 | 87.20       | 106.4000    | 60.00       | 117.8320    |
| 21          | 20 | 23 | 70.00       | 109.5000    | 90.00       | 118.8950    |
| 22          | 20 | 23 | 70.00       | 109.5000    | 90.00       | 118.8950    |
| 23          | 26 | 27 | 75.00       | 110.7000    | 90.00       | 109.3340    |
| 23          | 26 | 28 | 75.00       | 110.7000    | 90.00       | 109.3340    |
| 23          | 26 | 29 | 140.00      | 112.6240    | 140.00      | 112.3600    |
| 24          | 23 | 25 | 66.00       | 107.800     | <i>n.a.</i> | <i>n.a.</i> |
| 24          | 23 | 26 | 75.00       | 110.700     | <i>n.a.</i> | <i>n.a.</i> |
| 25          | 23 | 26 | 75.00       | 110.700     | 70.00       | 121.9150    |

<sup>a</sup> The atom numbering corresponding to the atom numbering used here are displayed in Figure S2, with States I and II corresponding to reactant and product states, respectively. The bending motion was described with a harmonic potential of the form  $E_{\text{angle}} = f_c \cdot (\theta - \theta_0)^2$ , where  $f_c$  is given in kcal·mol<sup>-1</sup> and  $\theta$  in °.

**Table S10.** Torsion parameters used to describe the two EVB states for the direct hydride transfer step of the oxidative deamination of N-methylhistamine by MAO-B.<sup>a</sup>

| Atom number |    |    |    | State I     |             |             | State II    |             |             |
|-------------|----|----|----|-------------|-------------|-------------|-------------|-------------|-------------|
| #1          | #2 | #3 | #4 | $V_1$       | $V_2$       | $V_3$       | $V_1$       | $V_2$       | $V_3$       |
| 1           | 2  | 4  | 5  | 0.000       | 3.968       | 0.000       | 0.000       | 2.325       | 0.000       |
| 1           | 2  | 4  | 17 | 0.000       | 1.015       | 0.000       | 0.000       | 2.325       | 0.000       |
| 5           | 7  | 16 | 1  | 0.000       | 0.839       | 0.000       | 0.000       | 7.000       | 0.000       |
| 8           | 7  | 16 | 1  | 0.000       | 3.500       | 0.000       | 0.000       | 7.000       | 0.000       |
| 14          | 15 | 16 | 1  | 0.000       | 1.826       | 0.000       | 0.000       | 3.968       | 0.000       |
| 2           | 1  | 16 | 7  | -1.183      | 0.456       | -0.425      | 0.000       | 3.625       | 0.000       |
| 2           | 1  | 16 | 15 | 0.000       | 1.826       | 0.000       | 0.000       | 3.625       | 0.000       |
| 2           | 4  | 5  | 6  | 0.000       | 3.045       | 0.000       | 0.000       | 3.625       | 0.000       |
| 2           | 4  | 5  | 7  | 1.150       | 3.045       | 0.000       | 0.000       | 3.625       | 0.000       |
| 16          | 1  | 2  | 4  | 0.000       | 1.826       | 0.000       | 0.000       | 5.000       | 0.000       |
| 4           | 5  | 7  | 8  | 0.000       | 3.500       | 0.000       | 0.000       | 7.000       | 0.000       |
| 4           | 5  | 7  | 16 | 0.000       | 0.550       | 0.000       | 0.000       | 7.000       | 0.000       |
| 5           | 7  | 8  | 9  | 0.000       | 7.000       | 0.000       | -3.791      | 1.715       | 1.599       |
| 5           | 7  | 8  | 24 | <i>n.a.</i> | <i>n.a.</i> | <i>n.a.</i> | 0.000       | 1.015       | 0.000       |
| 5           | 7  | 16 | 15 | 0.000       | 0.839       | 0.000       | 0.000       | 7.000       | 0.000       |
| 17          | 4  | 5  | 6  | 0.000       | 2.450       | 0.000       | 0.000       | 3.625       | 0.000       |
| 6           | 5  | 7  | 8  | 0.000       | 0.410       | 0.000       | 0.000       | 7.000       | 0.000       |
| 6           | 5  | 7  | 16 | 0.000       | 1.050       | 0.000       | 0.000       | 7.000       | 0.000       |
| 17          | 4  | 5  | 7  | 0.000       | 2.450       | 0.000       | 0.000       | 1.525       | 0.000       |
| 7           | 8  | 9  | 10 | 0.000       | 3.625       | 0.000       | -3.791      | 1.715       | 1.599       |
| 7           | 8  | 9  | 14 | 0.000       | 3.625       | 0.000       | -3.791      | 1.715       | 1.599       |
| 8           | 7  | 16 | 15 | 0.0000      | 3.500       | 0.000       | 0.000       | 7.000       | 0.000       |
| 16          | 7  | 8  | 9  | 0.000       | 7.000       | 0.000       | -3.791      | 1.715       | 1.599       |
| 24          | 8  | 9  | 10 | <i>n.a.</i> | <i>n.a.</i> | <i>n.a.</i> | 0.000       | 1.015       | 0.000       |
| 24          | 8  | 9  | 14 | <i>n.a.</i> | <i>n.a.</i> | <i>n.a.</i> | 0.000       | 1.015       | 0.000       |
| 16          | 7  | 8  | 24 | <i>n.a.</i> | <i>n.a.</i> | <i>n.a.</i> | 0.000       | 1.015       | 0.000       |
| 20          | 23 | 26 | 27 | 0.1500      | 0           | 0           | 0           | 0           | 0           |
| 20          | 23 | 26 | 28 | 0.1500      | 0           | 0           | 0           | 0           | 0           |
| 20          | 23 | 26 | 29 | 0.8375      | 0.3220      | 0.7060      | 0           | 0           | 0           |
| 21          | 20 | 23 | 24 | 0.2000      | 0           | 0           | <i>n.a.</i> | <i>n.a.</i> | <i>n.a.</i> |
| 21          | 20 | 23 | 25 | 0.2000      | 0           | 0           | 2.000       | 0           | 0           |
| 21          | 20 | 23 | 26 | -0.0595     | 0.0885      | 0.1175      | 2.000       | 0           | 0           |
| 22          | 20 | 23 | 24 | 0.2000      | 0           | 0           | <i>n.a.</i> | <i>n.a.</i> | <i>n.a.</i> |
| 22          | 20 | 23 | 25 | 0.2000      | 0           | 0           | 2.000       | 0           | 0           |
| 22          | 20 | 23 | 26 | -0.0595     | 0.0885      | 0.1175      | 2.000       | 0           | 0           |
| 23          | 26 | 29 | 30 | 0.0415      | 0           | 0           | 0.1805      | 0           | 0           |
| 23          | 26 | 29 | 36 | 0.2930      | -1.1970     | 0.6090      | 0.0430      | 0           | 0           |
| 24          | 23 | 26 | 27 | 0.1500      | 0           | 0           | <i>n.a.</i> | <i>n.a.</i> | <i>n.a.</i> |
| 24          | 23 | 26 | 28 | 0.1500      | 0           | 0           | <i>n.a.</i> | <i>n.a.</i> | <i>n.a.</i> |
| 24          | 23 | 26 | 29 | 0.4320      | 0           | 0           | <i>n.a.</i> | <i>n.a.</i> | <i>n.a.</i> |
| 25          | 23 | 26 | 27 | 0.1500      | 0           | 0           | 0.3310      | 0           | 0           |
| 25          | 23 | 26 | 28 | 0.1500      | 0           | 0           | 0.3310      | 0           | 0           |
| 25          | 23 | 26 | 29 | 0.4320      | 0           | 0           | 0           | 0           | 0           |

<sup>a</sup>The atom numbering corresponds to the atom numbers used in Figure S2, with States I and II corresponding to the reactant and product states respectively. All parameters have units of kcal·mol<sup>-1</sup>. Dihedral interactions (including improper dihedrals) were described by a periodic function of the form  $E_{\text{torsion}} = V_1 \cdot (1 + \cos \varphi) + V_2 \cdot (1 - \cos 2\varphi) + V_3 \cdot (1 + \cos 3\varphi)$ .

**Table S11.** Improper torsion types used to describe the two EVB states for the direct hydride transfer step of the oxidative deamination of N-methylhistamine by MAO-B.<sup>a</sup>

| Atom number |    |    |    | State I     |             | State II |          |
|-------------|----|----|----|-------------|-------------|----------|----------|
| #1          | #2 | #3 | #4 | $k_a$       | $\tau_0$    | $k_a$    | $\tau_0$ |
| 7           | 5  | 4  | 6  | 10.5        | 180         | 1.1      | 180      |
| 16          | 7  | 5  | 8  | 10.5        | 180         | 1.1      | 180      |
| 23          | 20 | 21 | 22 | <i>n.a.</i> | <i>n.a.</i> | 1        | 180      |
| 7           | 8  | 9  | 24 | <i>n.a.</i> | <i>n.a.</i> | 1        | 180      |
| 26          | 23 | 25 | 20 | <i>n.a.</i> | <i>n.a.</i> | 10.5     | 180      |

<sup>a</sup>The units of  $k_a$  and  $\tau_0$  are given in kcal·mol<sup>-1</sup>·rad<sup>-2</sup> and °, respectively

Optimized transition state for reference reaction for direct hydride transfer from histamine to FAD of the MAO-B active site (Cartesian coordinates, in Å).

Transition state histamine (TS)

|   |           |           |           |
|---|-----------|-----------|-----------|
| H | 0.000881  | 0.080626  | 0.015165  |
| N | -0.040777 | 0.006174  | 7.193443  |
| C | 0.408353  | 0.051443  | 8.492055  |
| O | -0.305054 | -0.135307 | 9.461829  |
| N | 1.770709  | 0.346668  | 8.702807  |
| C | 2.707618  | 0.617310  | 7.728365  |
| O | 3.852044  | 0.977934  | 7.995860  |
| C | 2.189026  | 0.520562  | 6.378068  |
| N | 3.067217  | 0.759291  | 5.359403  |
| C | 2.540167  | 0.639453  | 4.054232  |
| C | 3.397534  | 0.812414  | 2.967633  |
| C | 2.953145  | 0.721078  | 1.653680  |
| C | 3.905542  | 0.909665  | 0.501740  |
| C | 1.594083  | 0.429940  | 1.425339  |
| C | 1.069308  | 0.306420  | 0.018336  |
| C | 0.735174  | 0.248769  | 2.506457  |
| C | 1.182793  | 0.356075  | 3.831569  |
| N | 0.317497  | 0.177264  | 4.914791  |
| C | 0.801950  | 0.233145  | 6.209614  |
| C | -1.073867 | -0.176844 | 4.673003  |
| H | -1.131978 | -1.118769 | 4.117813  |
| H | 1.585002  | -0.491218 | -0.527483 |
| H | 1.222338  | 1.232323  | -0.546817 |
| H | 3.965802  | 0.007383  | -0.116742 |
| H | 4.911305  | 1.138256  | 0.860817  |
| H | 3.585483  | 1.727231  | -0.153680 |
| H | -0.306912 | 0.026970  | 2.306521  |
| H | 4.445587  | 1.011851  | 3.180587  |
| H | 2.070065  | 0.407282  | 9.668334  |
| H | -1.560434 | -0.291890 | 5.638073  |
| H | -1.569954 | 0.611540  | 4.098177  |
| N | 1.953418  | 3.089941  | 6.559015  |
| H | 1.021763  | 3.077973  | 6.169386  |
| H | 2.022176  | 3.292936  | 7.552809  |
| C | 3.029991  | 3.287772  | 5.778529  |
| H | 2.823559  | 3.530187  | 4.735376  |
| C | 4.289497  | 3.815438  | 6.432774  |
| H | 5.093229  | 3.847195  | 5.693019  |
| H | 4.589652  | 3.117461  | 7.222216  |
| C | 4.067612  | 5.179140  | 7.022637  |
| C | 4.653438  | 6.378077  | 6.707312  |
| H | 5.403640  | 6.648388  | 5.980940  |

|   |          |          |          |
|---|----------|----------|----------|
| N | 4.089661 | 7.294972 | 7.565491 |
| H | 4.302357 | 8.279250 | 7.612886 |
| C | 3.199683 | 6.627051 | 8.346269 |
| H | 2.616255 | 7.115493 | 9.113525 |
| N | 3.161134 | 5.351455 | 8.044984 |
| H | 3.482214 | 1.803506 | 5.490961 |

Optimized transition state for referece reaction for direct hydride transfer from N-methylhistamine to FAD of the MAO-B active site (Cartesian coordinates, in Å).

Transition state N-methylhistamine (TS)

|   |           |           |           |
|---|-----------|-----------|-----------|
| H | -5.462051 | -2.703650 | -1.862245 |
| N | -1.495574 | 3.166459  | -0.681396 |
| C | -0.577198 | 4.016760  | -0.112655 |
| O | -0.414701 | 5.171774  | -0.464479 |
| N | 0.227229  | 3.508399  | 0.927763  |
| C | 0.195599  | 2.225856  | 1.433266  |
| O | 0.999540  | 1.828656  | 2.274224  |
| C | -0.809940 | 1.381999  | 0.817581  |
| N | -0.913372 | 0.101939  | 1.281001  |
| C | -1.911693 | -0.692161 | 0.675451  |
| C | -2.095175 | -1.997630 | 1.131175  |
| C | -3.049331 | -2.845459 | 0.581242  |
| C | -3.222150 | -4.250550 | 1.096536  |
| C | -3.862744 | -2.353605 | -0.458155 |
| C | -4.918767 | -3.232565 | -1.076304 |
| C | -3.688952 | -1.048668 | -0.912283 |
| C | -2.712272 | -0.200976 | -0.368665 |
| N | -2.531827 | 1.104945  | -0.833248 |
| C | -1.592092 | 1.930973  | -0.242152 |
| C | -3.404025 | 1.625301  | -1.876369 |
| H | -4.446249 | 1.607057  | -1.541267 |
| H | -5.645380 | -3.565946 | -0.327399 |
| H | -4.477037 | -4.133255 | -1.516816 |
| H | -4.227265 | -4.404908 | 1.504295  |
| H | -2.502138 | -4.466188 | 1.888875  |
| H | -3.081961 | -4.989827 | 0.300266  |
| H | -4.324773 | -0.691056 | -1.713952 |
| H | -1.466324 | -2.335988 | 1.952041  |
| H | 0.913077  | 4.145619  | 1.313860  |
| H | -3.104217 | 2.650077  | -2.079777 |
| H | -3.307428 | 1.022519  | -2.784985 |
| N | 1.183723  | 0.520280  | -0.605632 |

|   |          |           |           |
|---|----------|-----------|-----------|
| H | 0.671968 | 0.594355  | -1.472919 |
| H | 1.930064 | 1.195947  | -0.468003 |
| C | 1.220882 | -0.635715 | 0.081373  |
| H | 0.741315 | -1.489296 | -0.399582 |
| C | 2.391367 | -0.869847 | 1.011568  |
| H | 2.221343 | -1.788601 | 1.578734  |
| H | 2.439270 | -0.040999 | 1.726420  |
| C | 3.681823 | -0.958580 | 0.247622  |
| C | 4.556874 | -2.009114 | 0.122363  |
| H | 4.551650 | -3.009683 | 0.528420  |
| N | 5.577611 | -1.553042 | -0.679628 |
| C | 6.753724 | -2.297928 | -1.088122 |
| C | 5.274989 | -0.268746 | -1.002491 |
| H | 5.920999 | 0.331274  | -1.629473 |
| N | 4.142378 | 0.122555  | -0.464469 |
| H | 0.089465 | -0.407232 | 1.140593  |
| H | 7.367914 | -1.658914 | -1.723589 |
| H | 7.338116 | -2.595098 | -0.214535 |
| H | 6.464245 | -3.186465 | -1.653553 |
